# Supplementary material
Source: Elsevier journal article supplement (https://www.sciencedirect.com/science/article/pii/S2445147921000047)
Supplement: mmc1 [file S2445147921000047:mmc1.docx]

**Anexo 1**

## Cuestionario de Jeffries para evaluación de simulación clínica (QJSC)

**Cuestionario de Prácticas Docentes (B) (versión estudiante)**

La siguiente encuesta tiene por objetivo identificar si las mejores prácticas están siendo utilizados en nuestra simulación. Por favor, llene la encuesta marcando con una X bajo el número que represente lo UD. piensa. No hay respuestas correctas o incorrectas. Por favor, utilice los siguientes códigos para responder a las preguntas.

**Utilice el siguiente sistema de calificación al evaluar**

1. **Muy en desacuerdo con la declaración**
2. **En desacuerdo con la declaración**
3. **Ni de acuerdo y ni en desacuerdo con la declaración**
4. **De acuerdo con la declaración**
5. **Totalmente de acuerdo con la declaración**
6. **No es aplicable, la declaración no se refiere a la simulación realizada.**

|  | **Item** | **1** | **2** | **3** | **4** | **5** | **N/a** |
| --- | --- | --- | --- | --- | --- | --- | --- |
|  | **Actividades de aprendizaje** |  |  |  |  |  |  |
| **1** | He tenido la oportunidad durante la simulación para analizar las ideas y conceptos que se enseñan. |  |  |  |  |  |  |
| **2** | He participado activamente en las discusiones y reflexiones sostenidas después de la simulación |  |  |  |  |  |  |
| **3** | Tuve la oportunidad de hacer mis comentarios durante el debriefing. |  |  |  |  |  |  |
|  | **Item** | **1** | **2** | **3** | **4** | **5** | **N/a** |
|  | **Feedback** |  |  |  |  |  |  |
| **4** | Existen suficientes oportunidades durante la simulación para poder saber si claramente entendí |  |  |  |  |  |  |
| **5** | Aprendí de las observaciones formuladas por el profesor antes, durante o después de la simulación. |  |  |  |  |  |  |
| **6** | He recibido señales durante la simulación. |  |  |  |  |  |  |
|  | **Interacción** | **1** | **2** | **3** | **4** | **5** | **N/a** |
| **7** | Tuve la oportunidad de discutir los objetivos de la simulación con el profesor. |  |  |  |  |  |  |
| **8** | Tuve la oportunidad de debatir las ideas y los conceptos enseñados en la simulación  con mi instructor. |  |  |  |  |  |  |
|  | **Colaboración** | **1** | **2** | **3** | **4** | **5** | **N/a** |
| **9** | Tuve la oportunidad de trabajar con mis compañeros durante la simulación. |  |  |  |  |  |  |
| **10** | Durante la simulación, mis compañeros y yo tuvimos que trabajar juntos |  |  |  |  |  |  |
|  | **Altas expectativas** | **1** | **2** | **3** | **4** | **5** | **N/a** |
| **11** | Mi instructor me esperaba para llevar a cabo la simulación. |  |  |  |  |  |  |
| **12** | Los objetivos de la simulación  fueron claros y fáciles de comprender. |  |  |  |  |  |  |
| **13** | Mi instructor comunicó los objetivos y las expectativas a lograr durante la simulación. |  |  |  |  |  |  |

|  | **Item** | **1** | **2** | **3** | **4** | **5** | **N/a** |
| --- | --- | --- | --- | --- | --- | --- | --- |
|  | **Diversas formas de aprendizaje** |  |  |  |  |  |  |
| **14** | El instructor fue capaz de responder a las necesidades individuales de los alumnos durante la simulación. |  |  |  |  |  |  |
| **15** | La simulación ofreció una variedad de formas para aprender. |  |  |  |  |  |  |
| **16** | La simulación ofreció maneras variadas para valorar mi aprendizaje |  |  |  |  |  |  |
|  | **Tiempo sobre la Tarea** |  |  |  |  |  |  |
| **17** | Necesité más tiempo para preparar la simulación que para otro curso. |  |  |  |  |  |  |
| **18** | El uso de actividades de simulación hacen que mi tiempo de estudio sea más productivo. |  |  |  |  |  |  |
